# Supplementary material
Source: PubMed Central journal article supplement (PMC6460418)
Supplement: blood883710-suppl1.pdf [file blood883710-suppl1.pdf]

**SUPPLEMENTAL TABLES:**

**Table S1: Lymphodepletion chemotherapy regimens.**

| <b>Lymphodepletion Regimen</b>                                                          | <b>Number of Patients</b> |
|-----------------------------------------------------------------------------------------|---------------------------|
| Cyclophosphamide 2 g/m <sup>2</sup> Day 1;<br>Etoposide 100 mg/m <sup>2</sup> Days 1-3  | 1                         |
| Cyclophosphamide 4 g/m <sup>2</sup> Day 1;<br>Etoposide 200 mg/m <sup>2</sup> Days 2-4  | 1                         |
| Cyclophosphamide 2 g/m <sup>2</sup> Day 1                                               | 7                         |
| Cyclophosphamide 3 g/m <sup>2</sup> Day 1                                               | 1                         |
| Cyclophosphamide 4 g/m <sup>2</sup> Day 1                                               | 1                         |
| Cyclophosphamide 30 mg/kg Day 1;<br>Fludarabine 25 mg/m <sup>2</sup> Days 2-4           | 2                         |
| Cyclophosphamide 60 mg/kg Day 1;<br>Fludarabine 25 mg/m <sup>2</sup> Days 2-4           | 24                        |
| Cyclophosphamide 60 mg/kg Day 1;<br>Fludarabine 25 mg/m <sup>2</sup> Days 2-6           | 5                         |
| Cyclophosphamide 300 mg/m <sup>2</sup> and<br>Fludarabine 30 mg/m <sup>2</sup> Days 1-3 | 11                        |
| <b>Total</b>                                                                            | <b>53</b>                 |

**Table S2: Sites of extramedullary disease.**

| <b>Extramedullary site</b> | <b>No. of patients<sup>a</sup></b> |
|----------------------------|------------------------------------|
| Any extramedullary disease | 18                                 |
| Soft tissue                | 7                                  |
| Bone lesions               | 5                                  |
| Renal                      | 2                                  |
| Lymph nodes                | 4                                  |
| Central nervous system     | 5                                  |

<sup>a</sup> some patients had > 1 extramedullary site with leukemic involvement

**Table S3: Univariate analyses of factors associated with achievement of MRD-negative CR.**

| <b>Pre-treatment characteristics</b>                                             | <b>Odds Ratio</b> | <b>P value <sup>a</sup></b> |
|----------------------------------------------------------------------------------|-------------------|-----------------------------|
| Age (in years)                                                                   | 0.99              | .982                        |
| Sex (Female)                                                                     | 1.143             | .993                        |
| ECOG performance status (0-2)                                                    | 1.12              | .871                        |
| High risk cytogenetics (Y)                                                       | 0.90              | .894                        |
| Prior regimens (no.)                                                             | 0.94              | .742                        |
| Prior allogeneic hematopoietic cell transplant (Y)                               | 0.40              | .247                        |
| Prior blinatumomab (Y)                                                           | 1.75              | .621                        |
| Marrow disease burden by flow cytometry (%)                                      | 0.99              | .828                        |
| Extramedullary disease (Y)                                                       | 0.45              | .306                        |
| CNS leukemic involvement (Y)                                                     | <b>0.08</b>       | <b>.013</b>                 |
| Time from leukapheresis to lymphodepletion (days)                                | 4.48              | .412                        |
| Bridging systemic therapy (Y)                                                    | 1.09              | .922                        |
| <b>Therapy-related and CAR-T cell kinetics</b>                                   |                   |                             |
| Dose level (2x10 <sup>6</sup> vs 2x10 <sup>5</sup> CAR-T cells/kg)               | 5.11              | .142                        |
| Fludarabine containing lymphodepletion (Y)                                       | 0.50              | .539                        |
| Peak CAR-T cells by qPCR (log <sub>10</sub> transgene copies/μg DNA)             | <b>7.47</b>       | <b>.001</b>                 |
| Peak CD8 <sup>+</sup> CAR-T cell count (log <sub>10</sub> cells/μL) <sup>b</sup> | <b>5.55</b>       | <b>.001</b>                 |
| Peak CD4 <sup>+</sup> CAR-T cell count (log <sub>10</sub> cells/μL) <sup>b</sup> | <b>6.06</b>       | <b>.003</b>                 |
| AUC28 CD4 <sup>+</sup> CAR-T cells (log <sub>10</sub> cells/μL) <sup>b</sup>     | <b>20.57</b>      | <b>.004</b>                 |
| AUC28 CD8 <sup>+</sup> CAR-T cells (log <sub>10</sub> cells/μL) <sup>b</sup>     | <b>9.19</b>       | <b>.005</b>                 |
| AUC28 CAR-T cells by qPCR (log <sub>10</sub> transgene copies/μg DNA)            | <b>17.41</b>      | <b>.012</b>                 |
| Any grade of CRS (Y)                                                             | <b>7.71</b>       | <b>.014</b>                 |
| Peak CRS grade (0-4)                                                             | <b>2.85</b>       | <b>.021</b>                 |
| Any grade of neurotoxicity (Y)                                                   | 1.96              | .129                        |
| <b>Biomarkers</b>                                                                |                   |                             |
| Serum soluble TNFRp55 (fold change, pre-lymphodepletion to day 0)                | <b>4662.49</b>    | <b>.014</b>                 |
| Serum soluble TNFRp75 (log <sub>10</sub> pg/mL, pre-lymphodepletion)             | <b>0.17</b>       | <b>.027</b>                 |
| Serum IL-18 (log <sub>10</sub> pg/mL, pre-lymphodepletion)                       | <b>0.11</b>       | <b>.034</b>                 |
| Serum TNF-α (log <sub>10</sub> pg/mL, day 0)                                     | <b>2.57</b>       | <b>.044</b>                 |
| Serum IL-15 (log <sub>10</sub> pg/mL, pre-lymphodepletion)                       | 5.51              | .061                        |
| Serum IL-15 (log <sub>10</sub> pg/mL, day 0)                                     | 11.44             | .070                        |
| Serum IL-22 (log <sub>10</sub> pg/mL, AUC28)                                     | 4.55              | .083                        |
| Serum IFN-γ (log <sub>10</sub> pg/mL AUC28)                                      | 236.65            | .095                        |
| Serum soluble TIM-3 (log <sub>10</sub> pg/mL AUC28)                              | 2.13              | .092                        |
| Serum IL-22 (log <sub>10</sub> pg/mL, day 0)                                     | 21.29             | .096                        |
| Serum MCP-1 (log <sub>10</sub> pg/mL, day 0)                                     | 5.37              | .100                        |

<sup>a</sup> P value from logistic regression without multiplicity adjustment

<sup>b</sup> absolute counts by flow cytometry

ECOG, Eastern Cooperative Oncology Group; CNS, central nervous system; CRS, cytokine release syndrome; AUC28, calculated area under the curve from day 0 to 28.

**Table S4: Multivariable model applied to patients who achieved MRD-negative CR and were evaluable by high-throughput sequencing (HTS).**

| <b>Variable (in patients who achieved MRD-negative CR who were evaluable by HTS, n=28)</b> | <b>Multivariable HR (95% CI)</b> | <b>P value</b> |
|--------------------------------------------------------------------------------------------|----------------------------------|----------------|
| LDH pre-lymphodepletion (per 100 U/L increment)                                            | 1.45 (1.12-1.88)                 | .005           |
| Platelets pre-lymphodepletion (per 50,000/ $\mu$ L increment)                              | 0.47 (0.27-0.80)                 | .005           |
| Fludarabine added to lymphodepletion (Y)                                                   | 0.27 (0.09-0.82)                 | .021           |
| HTS-positive on re-staging (Y)                                                             | 5.56 (1.75-17.67)                | .004           |

HR, hazard ratio

**Table S5: Characteristics of patients in MRD-negative CR after CAR-T cell therapy who did or did not proceed to allogeneic hematopoietic cell transplantation (HCT).**

| Characteristics prior to CAR-T cell therapy        | Allogeneic HCT in MRD-negative CR | No HCT in MRD-negative CR | All patients     |
|----------------------------------------------------|-----------------------------------|---------------------------|------------------|
| <b>Patients Evaluable, n</b>                       | 18                                | 27                        | 45               |
| Age, years                                         |                                   |                           |                  |
| Median [IQR]                                       | 35 [26, 48]                       | 44 [32, 58]               | 39.0 [28, 53]    |
| Range                                              | 22, 73                            | 20, 76                    | 20, 76           |
| Sex, n (%)                                         |                                   |                           |                  |
| Female                                             | 7 (39)                            | 16 (59)                   | 23 (51)          |
| Male                                               | 11 (61)                           | 11 (41)                   | 22 (49)          |
| ECOG performance status, n (%)                     |                                   |                           |                  |
| 0                                                  | 11 (61)                           | 11 (41)                   | 22 (49)          |
| 1                                                  | 6 (33)                            | 16 (59)                   | 22 (49)          |
| 2                                                  | 1 (6)                             | 0 (0)                     | 1 (2)            |
| Philadelphia chromosome-positive, n (%)            |                                   |                           |                  |
| Yes                                                | 4 (22)                            | 6 (22)                    | 10 (22)          |
| No                                                 | 14 (78)                           | 21 (78)                   | 35 (78)          |
| High-risk cytogenetics, n (%)                      |                                   |                           |                  |
| Yes                                                | 7 (39)                            | 20 (74)                   | 27 (60)          |
| No                                                 | 11 (61)                           | 7 (26)                    | 18 (40)          |
| No. of prior regimens <sup>a</sup>                 |                                   |                           |                  |
| Median [IQR]                                       | 2.5 [1.5, 4]                      | 4 [3, 5]                  | 3 [3, 4]         |
| Range                                              | 1, 6                              | 2, 11                     | 1, 11            |
| Prior allogeneic HCT, n (%)                        |                                   |                           |                  |
| Yes                                                | 2 (11)                            | 16 (59)                   | 18 (40)          |
| No                                                 | 16 (89)                           | 11 (41)                   | 27 (60)          |
| Prior blinatumomab therapy, n (%)                  |                                   |                           |                  |
| Yes                                                | 4 (22)                            | 5 (18)                    | 9 (20)           |
| No                                                 | 14 (78)                           | 22 (82)                   | 36 (80)          |
| Marrow disease burden by flow cytometry, %         |                                   |                           |                  |
| Median [IQR]                                       | 11.3 [0.2, 27.2]                  | 46.0 [3.9, 84.8]          | 28.0 [0.6, 74.7] |
| Range                                              | 0.0, 80.0                         | 0.0, 97.6                 | 0.0, 97.6        |
| Extramedullary disease, n (%)                      |                                   |                           |                  |
| Yes                                                | 1 (94)                            | 13 (48)                   | 14 (31)          |
| No                                                 | 17 (6)                            | 14 (52)                   | 31 (69)          |
| CNS leukemic involvement, n (%)                    |                                   |                           |                  |
| Yes                                                | 1 (6)                             | 1 (4)                     | 2 (4)            |
| No                                                 | 17 (94)                           | 26 (96)                   | 43 (96)          |
| Pre-lymphodepletion LDH concentration (U/L)        |                                   |                           |                  |
| Median [IQR]                                       | 177 [133, 218]                    | 214 [176, 267]            | 201 [152, 245]   |
| Range                                              | 116, 334                          | 107, 1027                 | 107, 1027        |
| Pre-lymphodepletion platelet count (1000/ $\mu$ L) |                                   |                           |                  |
| Median [IQR]                                       | 171 [116, 218]                    | 58 [38, 146]              | 114 [50, 200]    |
| Range                                              | 48, 339                           | 3, 217                    | 3, 339           |
| Lymphodepletion, n (%)                             |                                   |                           |                  |
| Cyclophosphamide-based with fludarabine            | 14 (78)                           | 21 (78)                   | 35 (78)          |
| Cyclophosphamide-based without fludarabine         | 4 (22)                            | 6 (22)                    | 10 (22)          |
| CAR-T cell dose, n (%)                             |                                   |                           |                  |
| $2 \times 10^5$ CAR-T cells/kg                     | 8 (44)                            | 18 (67)                   | 26 (58)          |
| $2 \times 10^6$ CAR-T cells/kg                     | 10 (56)                           | 9 (33)                    | 19 (42)          |

|                                       |         |         |         |
|---------------------------------------|---------|---------|---------|
| Multivariable model risk group, n (%) |         |         |         |
| High risk                             | 8 (44)  | 22 (82) | 30 (67) |
| Low risk                              | 10 (56) | 5 (18)  | 15 (33) |

IQR, interquartile range

**SUPPLEMENTAL FIGURES:**

**Figure S1**

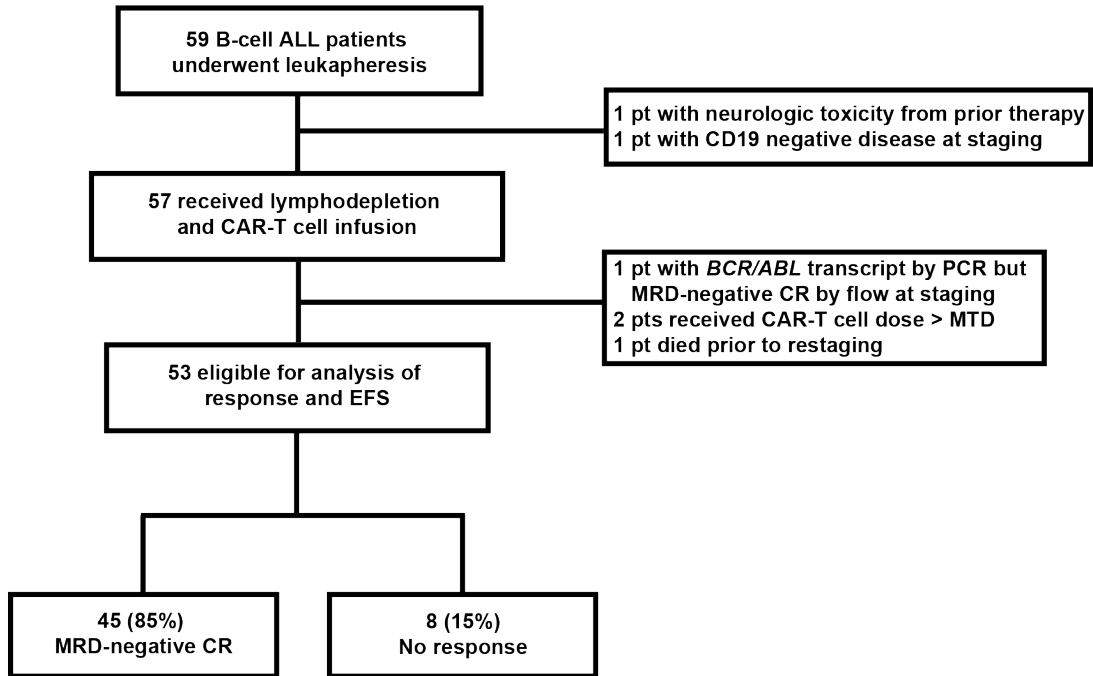

**Figure S1: Flow chart of patient enrollment and eligibility for response and event-free survival (EFS) analysis. MTD, maximum tolerated dose; MRD-negative CR, minimal residual disease-negative complete response.**

**Figure S2**

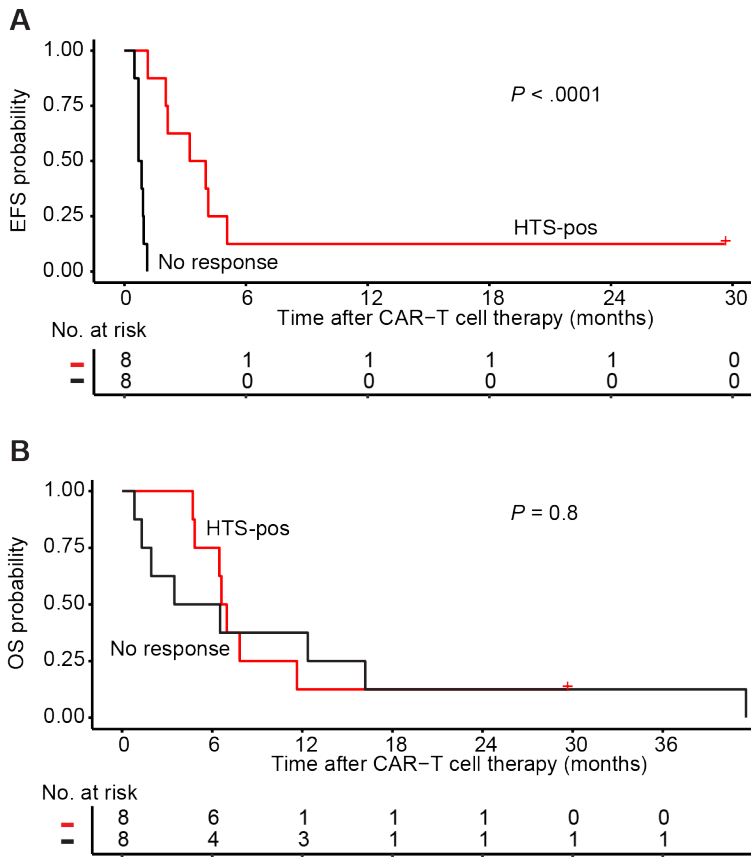

**Figure S2: Event-free (EFS) and overall survival (OS) in B-cell ALL patients after CD19 CAR-T cell therapy. (A-B) Kaplan-Meier analyses demonstrating EFS and OS in patients who achieve MRD-negative CR by high-resolution flow cytometry but had a persistence clone on high-throughput sequencing (HTS-pos, red line, n=8) compared to those with no response (black line, n=8).**

Figure S3

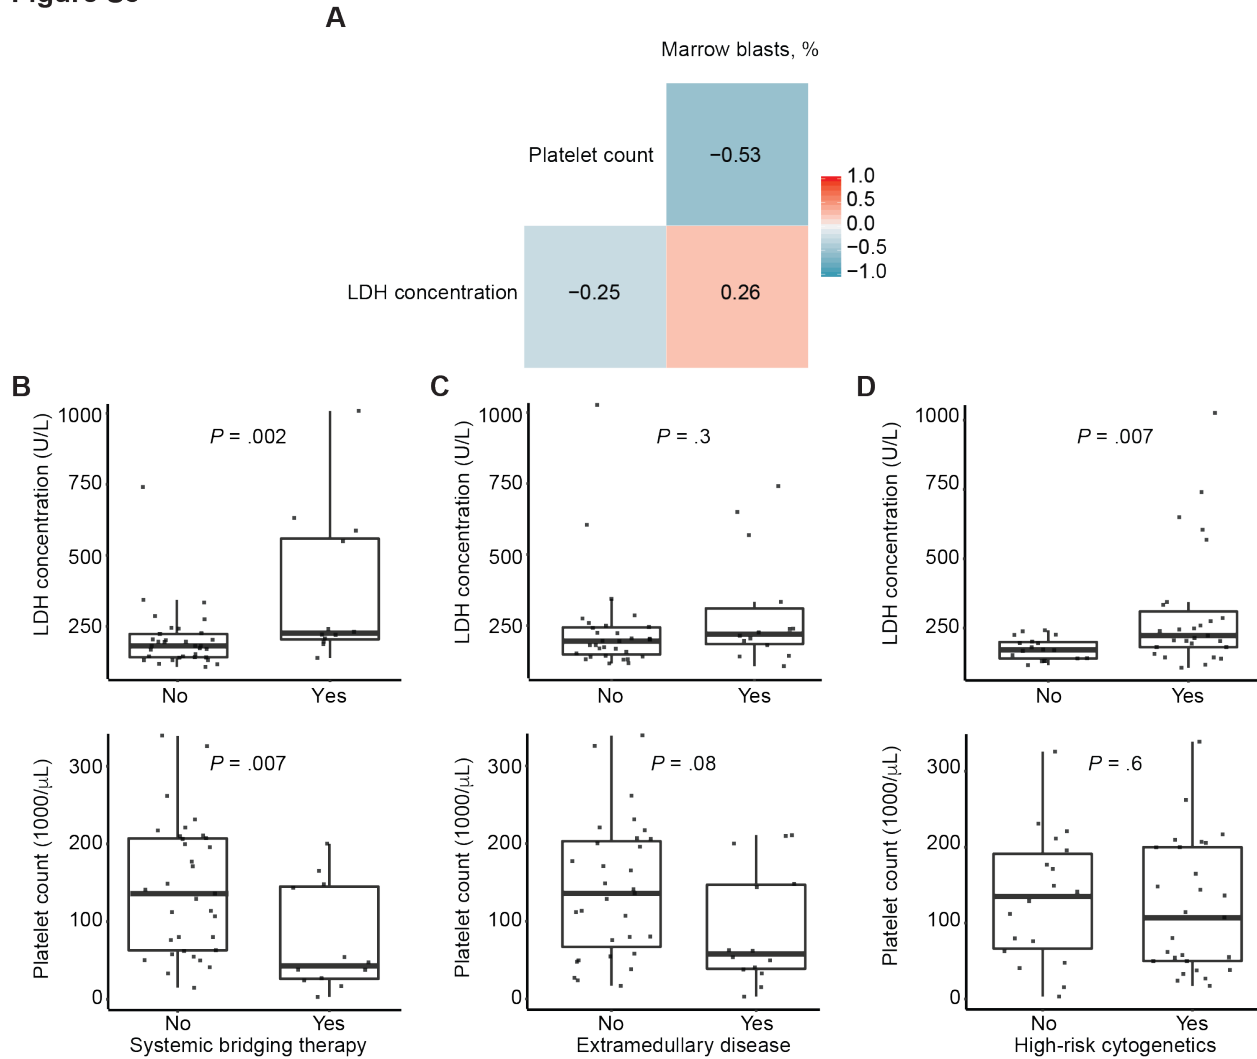

**Figure S3: Correlations between variables significant in univariate analysis of event-free survival. (A)** Correlations (R value) between pre-lymphodepletion LDH concentration, platelet count, and marrow blasts in the bone marrow by flow cytometry. **(B-D)** Boxplots demonstrating the associations of pre-lymphodepletion LDH concentration and platelet count with **(B)** systemic bridging therapy between leukapheresis and lymphodepletion, **(C)** presence of extramedullary disease, and **(D)** high-risk cytogenetics.



**Figure S4**

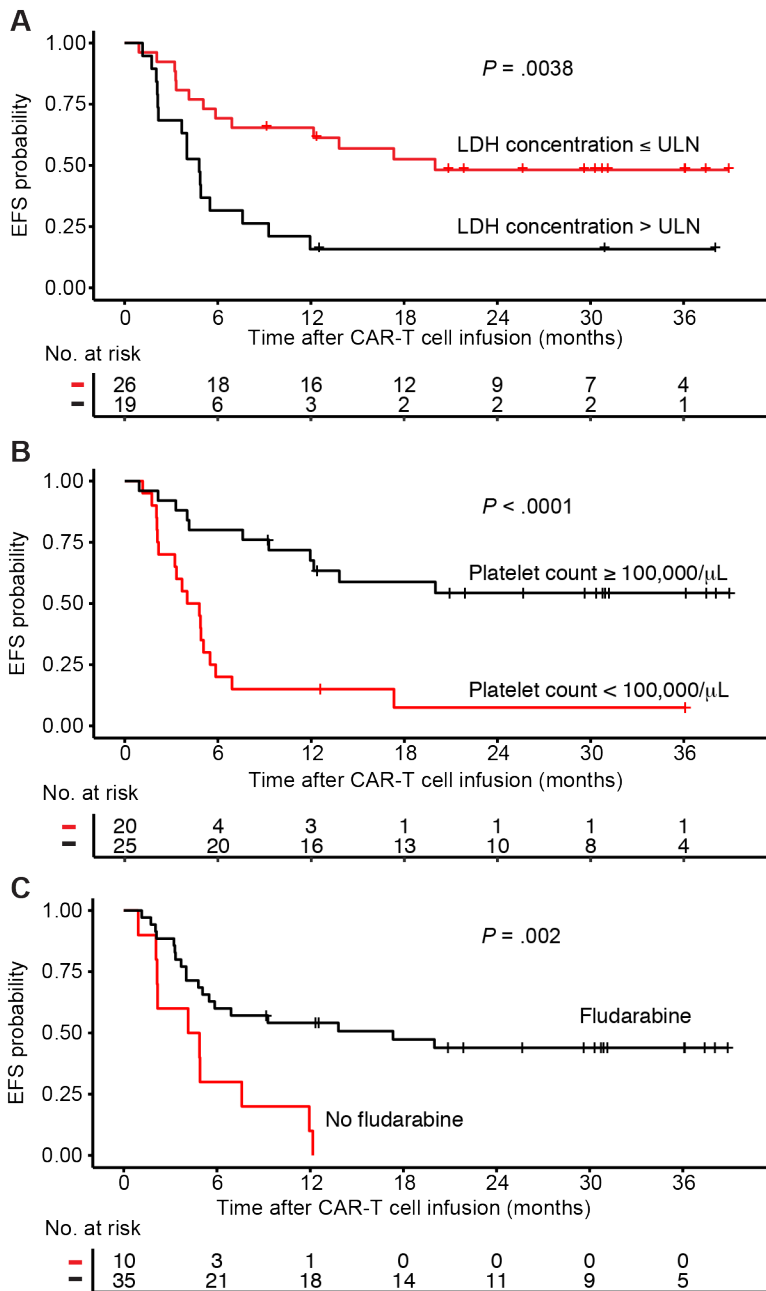

**Figure S4: Effect of factors associated with better event-free survival (EFS) in the multivariable model. (A-C) Kaplan-Meier analysis demonstrating better EFS in patients with pre-lymphodepletion LDH  $\leq$  upper limit of normal (ULN,  $P=.0038$ ), platelet count  $\geq$ 100,000/ $\mu$ L ( $P<.0001$ ), or who received fludarabine containing lymphodepletion ( $P=.002$ , Log-rank test).**

**Figure S5**

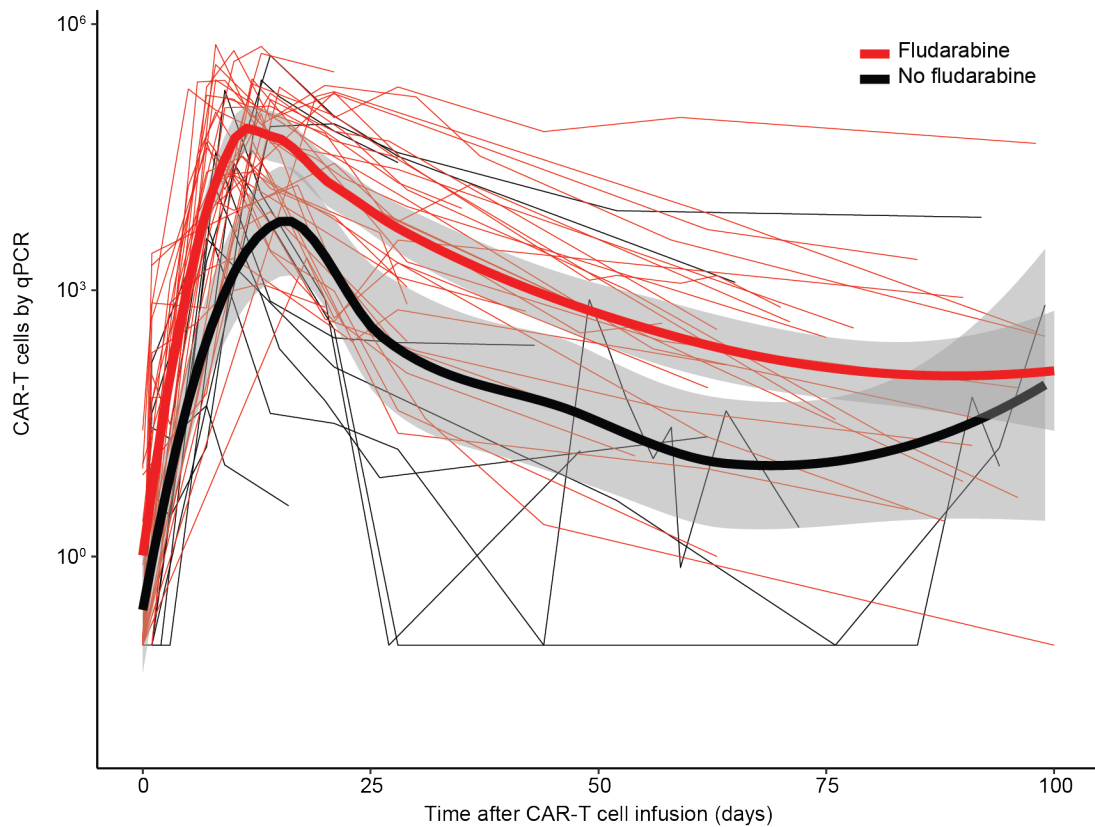

**Figure \ CAR-T cell kinetics according to lymphodepletion regimen.** Patients who received cyclophosphamide-based lymphodepletion with fludarabine (red lines) had higher CAR-T cell AUC<sub>28-90</sub> compared to patients who received cyclophosphamide-based lymphodepletion without fludarabine (black lines,  $P=.03$ , Welch two sample t-test). CAR-T cell levels in the blood were assessed by quantitative polymerase chain reaction (qPCR) to detect FlapEF1 $\alpha$  transgene copies/ $\mu$ g DNA. Each thin line represents a single patient; the bold lines represent the averaged data using LOESS (Local Polynomial Regression) curve fitting approximation with the standard error shown in grey.
